# Supplementary material
Source: publisher site journal article supplement (https://www.dovepress.com/article/307065)
Supplement: Supplementary file 1 [file get_supplementary_file.php]

| **Supplementary Table 1.** Outcomes of the TACE group | |
| --- | --- |
| Adverse events* | TACE group (n=40) |
| In-hospital mortality | 0 |
| Total Complications | 35 |
| Fever | 24 |
| Abdominal pain or discomfort | 29 |
| Nausea or vomiting | 34 |
| Abnormal liver biochemistry† | 26 |
| Leukopenia or thrombocytopenia | 10 |
| Bleeding or hematoma at puncture site | 1 |

*Adverse events were graded according to the National Cancer Institute Common Terminology Criteria for Adverse Events (CTCAE) v5.0. No grade 4 or 5 adverse events related to TACE were observed.

†Abnormal liver biochemistry included transient increase in alanine aminotransferase (ALT), aspartate aminotransferase (AST), γ-glutamyltranspeptidase (GGT) or bilirubin, and transient decrease in albumin.
